1 **Comparing DNA, RNA and protein levels for measuring microbial activity in**  
2 **nitrogen-amended soils**

3 Luis H. Orellana,<sup>a</sup> Janet K. Hatt,<sup>a</sup> Ramsunder Iyer,<sup>b,c</sup> Karuna Chourey,<sup>b</sup> Robert L. Hettich,<sup>b</sup> Jim  
4 C. Spain,<sup>d</sup> Wendy H. Yang,<sup>e</sup> Joanne C. Chee-Sanford,<sup>f</sup> Robert A. Sanford,<sup>g</sup> Frank E. Löffler,<sup>h,i</sup>  
5 Konstantinos T. Konstantinidis<sup>a,#</sup>

6  
7 <sup>a</sup> School of Civil and Environmental Engineering, Georgia Institute of Technology, Atlanta,  
8 Georgia, USA

9 <sup>b</sup> Chemical Sciences Division, Oak Ridge National Laboratory, Oak Ridge, Tennessee, USA

10 <sup>c</sup> Graduate School of Genome Science and Technology, University of Tennessee, Knoxville,  
11 Tennessee, USA

12 <sup>d</sup> Center for Environmental Diagnostics & Bioremediation, University of West Florida,  
13 Pensacola, Florida, USA

14 <sup>e</sup> Department of Geology, University of Illinois at Urbana-Champaign, Urbana, Illinois USA

15 <sup>f</sup> U.S. Department of Agriculture, Agricultural Research Service, Urbana, Illinois, USA

16 <sup>g</sup> University of Illinois at Urbana-Champaign, Urbana, Illinois, USA

17 <sup>h</sup> University of Tennessee, Knoxville, Tennessee, USA

18 <sup>i</sup> Biosciences Division, Oak Ridge National Laboratory, Oak Ridge, Tennessee, USA

19

20

21 Running head: Multi-omics of soil microcosms

22

23 <sup>#</sup>Address correspondence to Konstantinos T. Konstantinidis, [kostas@ce.gatech.edu](mailto:kostas@ce.gatech.edu)

24

25

26 **ABSTRACT**

27 Multi-omic techniques can offer a comprehensive overview of microbial communities at the  
28 gene, transcript and protein levels. However, to what extent these levels reflect *in situ* process  
29 rates is less clear, especially in highly complex habitats such as soils. Here we performed  
30 microcosm incubations using soil from a site with a history of agricultural management.  
31 Microcosms, amended with isotopically labelled ammonium and urea to simulate a fertilization  
32 event, showed nitrification (up to  $4.1 \pm 0.87 \mu\text{g N-NO}_3^- \text{ g}^{-1} \text{ dry soil d}^{-1}$ ) and accumulation of  $\text{N}_2\text{O}$   
33 after 192 hours of incubation. Nitrification activity ( $\text{NH}_4^+ \rightarrow \text{NH}_2\text{OH} \rightarrow \text{NO}_2^- \rightarrow \text{NO}_3^-$ ) was  
34 accompanied by a 6-fold increase in relative expression of the 16S rRNA gene (RNA/DNA)  
35 between 10 and 192 hours of incubation for ammonia-oxidizing bacteria (AOB) *Nitrosomonas*  
36 and *Nitrosospira*. In contrast, ammonia-oxidizing archaea (AOA) and complete ammonia  
37 oxidizer (comammox) nitrifiers showed stable gene expression during incubations but were  
38 generally more abundant (DNA level) than their *Betaproteobacteria* AOB counterparts. A strong  
39 relationship between nitrification activity and (mostly) betaproteobacterial ammonia  
40 monooxygenase (*amoA*;  $\text{NH}_4^+ \rightarrow \text{NH}_2\text{OH}$ ) and nitrite oxidoreductase (*nxrA*;  $\text{NO}_2^- \rightarrow \text{NO}_3^-$ )  
41 transcript abundances revealed that mRNA levels quantitatively reflected measured activity and  
42 were generally more sensitive than the DNA level in the microcosm incubations. Although  
43 peptides related to housekeeping proteins from nitrite-oxidizing microorganisms were detected,  
44 their abundance was not significantly correlated with activity, revealing that meta-proteomics  
45 provided only a qualitative assessment of activity. Altogether, these findings underscore the  
46 strengths and limitations of multi-omic approaches for assessing complex microbial  
47 communities and provide the molecular means to assess nitrification processes in soils.

48

49

50

51

52 **IMPORTANCE**

53 Even though the use of omic approaches has expanded our knowledge of the diversity of  
54 microbial communities in natural and engineered systems, it is less clear how well the use of  
55 whole community DNA-, RNA- or protein-based approaches reflect microbial activities. To this  
56 end, we directly compared the different levels of molecular information (i.e., DNA, RNA or  
57 proteins) in order to assess which level best correlated with isotope-based measurements of  
58 nitrification activity in agricultural soils after fertilization. This work reveals the strengths as well  
59 as the associated limitations of metagenomic, metatranscriptomic, and metaproteomic  
60 approaches in serving as reliable proxies for examining microbial activities in highly diverse  
61 environments like soils.

62

## 63 INTRODUCTION

64 Even though the central role of microbes in the cycling of nitrogen is recognized, the  
65 dynamics and controls of the interrelated microbial nitrogen pathways in agricultural soils are  
66 still poorly understood. This scarcity of information limits the development of more accurate,  
67 predictive models of nitrogen flux that encompasses the role of microbes in the generation and  
68 consumption of nitrogen substrates, as well as the emission of greenhouse gases, including  
69 nitrous oxide (N<sub>2</sub>O) (1). In agricultural soils receiving large inputs of nitrogen fertilizer, ammonia-  
70 oxidizing bacteria (AOB), ammonia-oxidizing archaea (AOA) and nitrite-oxidizing bacteria (NOB)  
71 collectively are responsible for the conversion of ammonium to nitrate. In addition, the recent  
72 discovery of *Nitrospira* bacteria capable of complete oxidation of ammonia to nitrate  
73 (comammox) has revealed that the process of nitrification in natural environments might be  
74 carried out by a single taxon (2, 3). It has also been reported that nitrification is a major N<sub>2</sub>O  
75 source under low oxygen concentrations (4), although detailed mechanistic understanding is  
76 lacking (5). Alternatively, under anoxic conditions, nitrate (NO<sub>3</sub><sup>-</sup>) can be reduced to gaseous  
77 forms such as dinitrogen (N<sub>2</sub>), nitric oxide (NO) or N<sub>2</sub>O by denitrifying organisms and  
78 consequently be lost to the atmosphere. Despite the apparent importance of nitrification in the  
79 generation of N<sub>2</sub>O and NO<sub>3</sub><sup>-</sup>, the relative contributions of comammox, AOA, AOB and NOB  
80 populations in this process, especially during soil fertilization events, is less clear (6). Advancing  
81 this issue is essential for better prediction of the contributions of these microbial taxa to the  
82 nitrogen cycle and the modeling of the corresponding activities and products. High-throughput  
83 sequencing and proteomic approaches offer the means to characterize the nitrogen pathways in  
84 the environment. However, to what extent these omic approaches reflect process rates is still  
85 unclear.

86 Although DNA, RNA, and protein abundances all reflect microbial potential and  
87 responses to environmental changes and thus, can be used to study nitrogen cycling in soils,  
88 each measurement generally offers different types of information. For instance, metagenomics

89 (DNA level) offers a comprehensive overview of the functional potential of microbial  
90 communities but does not generally reflect active community members or functions. Short-term  
91 microbial responses to external changes (e.g., nitrogen addition) can be tracked by analyzing  
92 the actively expressed genes (i.e., metatranscriptomics). For instance, the relationship between  
93 measured nitrification processes and the ammonia monooxygenase (*amoA*) transcripts have  
94 revealed differences between archaeal and bacterial activity in acidic soils (7). Proteomics  
95 provides a third level of molecular information much closer to the metabolic processes by  
96 reflecting synthesized enzymes that catalyze reactions. Although proteomics has been applied  
97 to only a limited number of natural microbial communities, the results have provided new  
98 insights about metabolic pathways and interdependencies among microbial groups [reviewed in  
99 (8)]. Furthermore, recent advances in metagenomics and metaproteomics techniques as well as  
100 integration with isotope-based technologies (e.g., NanoSIMS) have disentangled the role of  
101 previously elusive keystone microbial populations. The combined application of metagenomics  
102 and metaproteomics has provided new understanding of novel not yet cultured microorganisms  
103 participating in the cycling of sulfur, nitrogen, and carbon in the terrestrial subsurface (9).

104         Only a few studies have examined how the above approaches correlate with process  
105 rates, especially in soil ecosystems that are characterized by low metabolic activity along with  
106 high microbial diversity and heterogeneity. Thus far, almost all studies have provided only  
107 qualitative results from applications of omics to soils (10). Quantitative results in a few recent  
108 reports have focused mostly on systems with reduced diversity or specific functions and taxa  
109 (as opposed to community-wide activities). For instance, metatranscriptomic approaches  
110 examining the degradation of the herbicide atrazine by *Escherichia coli* in bioreactors revealed a  
111 linear relationship between the measured enzymatic activity and the transcripts encoding the  
112 associated enzyme (11). Additionally, in microbial leaf litter decomposition incubations, cellulase  
113 and xylanase protein abundances were positively correlated with their corresponding enzymatic  
114 activities (12). On the other hand, even though the combination of multi-omic datasets provided

115 new insights into diversity and gene potential of microbial communities of permafrost  
116 ecosystems, the datasets were less predictive of measured process rates (13). Therefore, to  
117 what extent the omic measurements correlate with each other and with process rates in soils  
118 remain unclear.

119       Toward closing this knowledge gap, we examined nitrogen-amended sandy soils  
120 obtained from a site with a history of agricultural management and application of synthetic  
121 nitrogen fertilizer. A prior year-round characterization of field samples from the same agricultural  
122 site revealed increased abundance of novel *Thaumarchaeota* and comammox nitrifiers, but the  
123 findings were limited to metagenomics (14). Here, our goal was to assess the strengths and  
124 limitations of multi-omics in detecting microbial activity by correlating measurements of DNA,  
125 RNA, and protein abundances with measured rates of nitrate formation and N<sub>2</sub>O production in  
126 soils incubated under controlled conditions in the laboratory. The results reveal that  
127 metatranscriptomic data best reflected the measured nitrification rates under the tested  
128 experimental conditions.

129

## 130 **RESULTS**

### 131 **Nitrification activity in soil microcosms**

132       We first examined nitrification activity in nitrogen-amended microcosms with an  
133 equimolar mixture of NH<sub>4</sub><sup>+</sup> and urea during an eight-day period by following NO<sub>3</sub><sup>-</sup> formation and  
134 NH<sub>4</sub><sup>+</sup> disappearance. Based on the NH<sub>4</sub><sup>+</sup> concentration patterns, urea quickly hydrolyzed to  
135 release NH<sub>4</sub><sup>+</sup> within the first two days of incubation (Figure 1a). Specifically, the NH<sub>4</sub><sup>+</sup>  
136 concentrations peaked at 48 hours of incubation (18.02 ± 1.5 µgN-NH<sub>4</sub><sup>+</sup> g<sup>-1</sup> dry soil) from urea  
137 hydrolysis, and decreased to 5.4 ± 2.5 µgN-NH<sub>4</sub><sup>+</sup> g<sup>-1</sup> dry soil by 192 hours of incubation due to  
138 nitrification. Nitrification activity increased five to eight days after the addition of the NH<sub>4</sub><sup>+</sup> and  
139 urea mixture, reaching an average rate of 4.1 ± 0.87 µg N-NO<sub>3</sub><sup>-</sup> g<sup>-1</sup> dry soil d<sup>-1</sup> (n = 6) after 192  
140 hours of the incubation (Figure 1b). The NO<sub>3</sub><sup>-</sup> concentrations gradually increased from an initial

141 value of  $0.81 \pm 0.28 \mu\text{gN-NO}_3^- \text{ g}^{-1}$  dry soil to  $1.91 \pm 0.5$  at 120 hours of incubation, and then  
142 increased at a faster rate to  $15.06 \pm 2.7 \mu\text{gN-NO}_3^- \text{ g}^{-1}$  dry soil at 192 hours of incubation (Figure  
143 1a). As a result of nitrification activity, pH values decreased across replicated nitrogen-amended  
144 microcosms during the incubation (Supplementary Table 1). In order to examine the generation  
145 of  $\text{N}_2\text{O}$  possibly generated as a by-product of oxidation reactions during nitrification, we  
146 measured the production of  $\text{N}_2\text{O}$  in nitrogen-amended incubations. Net  $\text{N}_2\text{O}$  production rates in  
147 the incubation headspace increased from  $0.08 \pm 0.006 \text{ ng N-N}_2\text{O g}^{-1}$  dry soil  $\text{d}^{-1}$  after 24 hours to  
148  $0.71 \pm 0.57 \text{ ng N-N}_2\text{O g}^{-1}$  dry soil  $\text{h}^{-1}$  at the end of the incubations (Figure 1c). Control  
149 microcosms receiving only irrigation water (i.e., no nitrogen amendment) did not show net  
150  $\text{NH}_4^+$  oxidation.

151 To evaluate possible differences between the use of  $\text{NH}_4^+$  or urea in the nitrifying  
152 activity, we determined  $^{15}\text{NO}_3^-$  production rates using nitrogen stable isotopes in the  
153 microcosms. In general,  $^{15}\text{NO}_3^-$  production was similar between  $^{15}\text{NH}_4^+$  and  $^{15}\text{N}$ -urea  
154 microcosms, although rates were higher after 10 and 48 hours of incubation (two tailed  $t$ -test,  
155  $P < 0.01$ ) in  $^{15}\text{NH}_4^+$  and  $^{15}\text{N}$ -urea microcosms, respectively, but converged thereafter  
156 (Supplementary Figure 1). By the end of the incubations, approximately half of the added  $^{15}\text{N}$   
157 was converted to  $^{15}\text{N-NO}_3^-$  (49-55% for both labelled solutions/treatments), and only a small  
158 fraction converted to  $^{15}\text{N-N}_2\text{O}$  (0.006-0.01%). The remaining added nitrogen was presumably  
159 converted to  $\text{N}_2$ , assimilated into microbial biomass, or adsorbed to soil particles.

160

### 161 **Soil metagenomes and metatranscriptomes**

162 To explore the genetic potential of microbial communities in control and nitrogen-  
163 amended microcosms, we examined the metagenomes and metatranscriptomes obtained from  
164 the incubated soils. Metagenomes ranged from 23.7 to 53.4 and metatranscriptomes from 10.1  
165 to 31.3 million short-reads per sample (Supplementary Tables 2 and 3). The estimated average  
166 coverage based on read redundancy using Nonpareil (15) ranged from 0.27 to 0.42 for the soil

167 metagenomes (values range from 0 to 1). The co-assembly of selected soil metagenomes  
168 generated 1.52 million contigs over 500 bp (assembly N50=1,176) and 1.56 million predicted  
169 protein-coding genes.

170 A high fraction of ribosomal RNA was detected for all metatranscriptomes ranging from  
171 94% to 98% of the total sequences (Supplementary Table 4). No rRNA depletion step was  
172 performed during our metatranscriptomic protocol due to overall low total RNA yields from the  
173 soils. As expected based on the length of the rRNA genes, 23S rRNA/16S rRNA ratios ranged  
174 from 1.7 to 1.9, indicating adequate RNA quality. Bacterial 16S rRNA (16S) was the most  
175 abundant, ranging between 30.6% and 35.9% of total transcripts per sample. Archaeal 16S and  
176 eukaryotic 18S rRNA molecules were less abundant, with values ranging from 0.09% to 0.15%  
177 and 0.55 to 2.9%, respectively.

178

### 179 **Taxonomy of microbial soil populations based on 16S rRNA gene sequences**

180 The taxonomic composition and abundances of the main microbial groups determined  
181 from recovered 16S rRNA (16S) gene sequences (DNA level) from nitrogen-amended  
182 incubations, were generally stable during incubations. At the class taxonomic level,  
183 *Actinobacteria*, *Betaproteobacteria*, and *Gammaproteobacteria* were the most abundant groups  
184 in metagenomes, accounting for more than 57% of the total community in nitrogen-amended  
185 incubations (Supplementary Figure 2). The taxonomic composition derived from  
186 metatranscriptomes (cDNA reads) was also stable during the incubations but the abundances  
187 for main taxonomical groups were substantially different from the metagenomes. For instance,  
188 *Betaproteobacteria*, *Gammaproteobacteria*, and *Flavobacteria* were among the most abundant  
189 groups in cDNA samples, accounting for an average of 77.5% of the 16S transcripts. In  
190 agreement with our previous results based on field samples from the same agricultural site (14),  
191 bacterial and archaeal groups associated with the nitrification processes were comparatively  
192 less abundant than the aforementioned groups in both DNA and cDNA datasets. For instance,



193 known AOB and NOB genera such as *Nitrosomonas* and *Nitrospira* had average relative  
194 abundances of 0.01% and 1.6% of the total populations in the metagenomes from incubated  
195 soils. Additionally, the relative abundances of the AOA genera related to *Nitrososphaera* and  
196 *Nitrosopumilus* were 0.9% and 0.3% in the microcosm metagenomes. Similar low abundances  
197 were determined for known nitrifier genera in metatranscriptomes. Notably, 16S transcript  
198 abundances for AOB conspicuously increased during the incubation period (Supplementary  
199 Figure 3). In fact, relative 16S gene expression ratios (cDNA/DNA) for AOB and NOB belonging  
200 to *Nitrosospira*, *Nitrosomonas* and *Nitrospira* increased 3-, 6-, and 14-fold between 10 and 192  
201 hours. In contrast, the 16S gene expression levels for the archaeal groups *Nitrososphaera* and  
202 *Nitrosopumilus* were stable during the same incubation period, although with a slight increase in  
203 relative expression at 48h of incubation (Supplementary Figure 3).

204

### 205 **Individual populations from microcosm metagenomes**

206 The assembly and binning of the soil metagenomes recovered 11 metagenome-  
207 assembled genomes (MAGs) mostly representing *Proteobacteria*, *Acidobacteria*, *Actinobacteria*  
208 and *Nitrospirae* phyla. Most of the recovered MAGs represented novel genera (n=7) and  
209 species (n=5) when the taxonomic novelty was evaluated against 10,487 reference genomes  
210 (taxonomically classified at the species level) using genome-aggregate amino acid identity (AAI)  
211 thresholds for taxonomic rank delineation (16) (Supplementary Table 5). Given that none of the  
212 MAGs represented AOA, AOB, NOB, or comammox populations, we included MAGs obtained  
213 from a previous analysis of field samples from the same site (Havana county, Illinois, USA) and  
214 depth as the soil used in the soil microcosms in the present study (14). MAGs potentially  
215 involved in nitrification processes were likely missed in the microcosm metagenomes due to  
216 comparatively lower sequencing effort or because of sample heterogeneity (e.g., lower  
217 population abundance) but had relatively higher abundance in the previous field samples. The  
218 MAGs (designated with the letter F at the end of their name for Field metagenomes) consisted

219 of two complete ammonia oxidizer (comammox) *Nitrospira* MAGs (MAG021F and MAG017F)  
220 and five ammonia-oxidizing archaea MAGs representing the *Thaumarchaeota* lineages I.1b  
221 (MAG032F and MAG019F) and I.1a (MAG004F, MAG109F, and MAG001F) (Supplementary  
222 Figure 4b). The *Nitrospira* MAG007, obtained from the microcosm metagenomes, was closely  
223 related to previously described soil comammox (e.g., MAG017F) organisms, sharing 67.8% AAI  
224 (SD: 18% based on 2201 shared proteins). However, the MAG007 only encoded a  
225 hydroxylamine oxidoreductase (*haoA*) gene and lacked *amoA* and *nxrA* genes (Supplementary  
226 Figure 4b). Furthermore, the *Nitrospira* MAG007 formed an independent but related cluster to  
227 the soil comammox organisms when reconstructed phylogenies using concatenated single-copy  
228 genes were evaluated (Supplementary Figure 5). Thus, AAI values and phylogenetic  
229 reconstruction supported the affiliation of MAG007 to *Nitrospira*, but the lack of genes involved  
230 in ammonia and nitrite oxidation (possibly due to low sequencing coverage) made it  
231 inconclusive whether this taxon is involved in nitrification processes and might indicate  
232 divergence from previously described soil comammox organisms.

233 Relative expression values of MAGs (measured as transcripts or reads per kilobase  
234 million, RPKM) were used as a proxy for comparing the response and metabolic activity among  
235 nitrifying bacteria and archaea during incubations. Even though expression values for most  
236 nitrifying MAGs belonging to *Nitrospira* and *Thaumarchaeota* were stable and relatively low,  
237 AOA MAGs 004F, 019F and comammox MAG017F, had, on average, the highest expression  
238 values throughout the incubations (Supplementary Figure 4a). For instance, the increase in  
239 expression values for AOA MAGs belonging to the I.1b clade, 004F and 032F, were 39% and  
240 50% after 48 hours of incubation (compared to expression levels at 10 hours incubation),  
241 respectively. In contrast, gene expression of comammox MAG017F and *Nitrospira* MAG007  
242 increased by 59% and 68% after 120 and 192 hours of incubation, respectively (Supplementary  
243 Figure 4a). Note that AOB and NOB were not included in the RPKM analysis due to lack of  
244 recovered MAGs representing these populations (see above). Nonetheless, a gene-based

245 approach allowed the analysis of changes in transcript abundances of genes involved in  
246 nitrification activity for AOB and NOB nitrifiers (see below).

247

### 248 **Quantification of nitrification genes in microcosms**

249 To further explore the microbial nitrification processes in incubated soils at the gene  
250 level, we specifically quantified gene fragments and transcripts directly involved in nitrification  
251 reactions. Relative expression values belonging to the gene encoding urease subunit c (*ureC*)  
252 were stable throughout the incubation but average abundances were relatively low compared to  
253 other nitrification genes (Figure 2a). The relative expression of the bacterial gene encoding  
254 ammonia monooxygenase subunit alpha (*amoA*) was 53.5-fold higher compared to the  
255 expression values at 10h of incubation. Most of the detected *amoA* transcripts (cDNA) were  
256 phylogenetically affiliated with *Betaproteobacteria* and corresponded to up to 90% of the total  
257 detected bacterial *amoA* transcripts at 192 hours of incubation (Figure 2a). Unlike  
258 betaproteobacterial *amoA*, abundance of transcripts belonging to comammox were stable  
259 throughout the incubation. Furthermore, transcripts belonging to comammox were more  
260 abundant compared to *Betaproteobacteria amoA* transcripts after 48 hours of incubation;  
261 however, at 192 hours of incubation, betaproteobacterial *amoA* DNA abundance increased 66-  
262 fold, whereas comammox *amoA* gene fragments remained stable (Figure 2b). The latter results  
263 indicated that the comammox *amoA* may be more abundant under field conditions but  
264 betaproteobacterial *amoA* might show a faster response upon ammonia addition, which was  
265 also consistent with a previous study (14). Although the relative expression for the archaeal  
266 *amoA* was more stable throughout the incubation compared to its betaproteobacterial  
267 counterparts, a maximum expression was reached after 120 hours of incubation, suggesting  
268 that archaeal *AmoA* activity temporarily increased at later time points during the incubation.  
269 Archaeal *amoA* transcripts belonging to the group I.1b were ~7 times more abundant than their  
270 I.1a counterpart across the incubations (Figure 2b). Similar to *amoA* patterns, the relative

271 expression for the betaproteobacterial hydroxylamine oxidoreductase (*haoA*;  $\text{NH}_2\text{OH} \rightarrow \text{NO}_2^-$ )  
272 steadily increased during the incubations, whereas comammox *haoA* transcripts represented  
273 the remaining smaller transcript fraction and were stable throughout the incubations (Figure 2b).  
274 Expression values for the nitrite oxidoreductase subunit alpha (*nxrA*;  $\text{NO}_2^- \rightarrow \text{NO}_3^-$ ) had a 12.4-  
275 fold increase compared to the 10-hour time point, consistent with the patterns observed for the  
276 previous nitrification genes and  $\text{NO}_3^-$  accumulation. Unexpectedly, expression values for *nirK*  
277 ( $\text{NO}_2^- \rightarrow \text{NO}$ ) affiliated to *Thaumarchaeota* were higher compared to *nirK* transcripts assigned to  
278 the *Nitrospira* clade. In fact, *Thaumarchaeota nirK* transcripts had a 3.4-fold increase after 192  
279 hours of incubation relative to earlier sampling points, indicating that *Thaumarchaeota* might  
280 have been more active in the reduction of nitrite compared to other steps of nitrification.  
281 Specifically, there was a 3.4-fold increase for clade I.1b *nirK* transcripts during the 10 to 192  
282 hours of incubation period, whereas the abundance of transcripts from clade I.1a were stable  
283 throughout the incubations (Figure 2b).

284 In summary, the metatranscriptomic profiles suggested that AOB, but not comammox,  
285 responded rapidly to the nitrogen amendment, whereas AOA followed with less pronounced  
286 transcriptome shifts. The response of AOB, and to a lesser extent AOA, was also reflected at  
287 the DNA level, albeit with a substantial time delay. For instance, shifts were observed early at  
288 the transcript level while at the DNA level, changes were mostly evident 192 hours after the start  
289 of incubation (Supplementary Figure 6a, b). These results were consistent across the individual  
290 nitrification steps and indicated that at least the AOB nitrifiers grew in response to nitrogen  
291 addition.

292

### 293 **A proteomic perspective in soil microcosms**

294 A metaproteomic analysis of the control and nitrogen-amended microcosms at 192  
295 hours of incubation detected a total of 2,892 and 1,629 non-redundant peptides, respectively. A  
296 total of 844 peptides were shared among control and nitrogen-amended incubations, whereas

297 2,048 and 785 were exclusively present in each microcosm, respectively. Most of peptides  
298 detected in control and nitrogen-amended incubations matched protein sequences predicted  
299 from metagenomic assemblies (89.4% and 88.2%, respectively) and the remaining fraction  
300 matched reference proteomes (Supplementary Table 6). The top 20 most abundant proteins in  
301 control and nitrogen-amended treatment microcosms were related to housekeeping and  
302 transport proteins whereas in the latter incubation, oxidoreductases for small carbon and alcohol  
303 molecules and ATP synthesis were among the most abundant proteins detected  
304 (Supplementary Table 7). The taxonomic affiliation, at the class level, for the most abundant  
305 annotated peptides belonged to *Alphaproteobacteria*, *Betaproteobacteria*, and *Acidobacteria* in  
306 control and nitrogen-amended incubations. Although there were major compositional changes  
307 for abundant groups such as *Betaproteobacteria* (40% decrease) and *Gammaproteobacteria*  
308 (50% decrease) (Figure 3a), increased abundance was detected for less abundant groups  
309 commonly associated with the nitrification process. For instance, close to a 2.2-fold increased  
310 abundance for nitrogen-amended incubations were detected for peptides belonging to  
311 *Nitrospira*. Detected peptides related to folding and synthesis were the most abundant and had  
312 similar abundances in the control and nitrogen-amended microcosms after 192 hours of  
313 incubation. However, the relative abundance of ATP synthases and transcription categories  
314 were higher in the nitrogen-amended samples relative to the control, presumably as a  
315 consequence of a higher microbial activity generated after the nitrogen input. On the other hand,  
316 heat-shock and degradation proteins were more abundant in the control incubation, probably  
317 reflecting a more prevailing dormant state for the microbial communities in these samples  
318 (Figure 3b). However, unlike the metagenomic and metatranscriptomic datasets, only some  
319 peptides involved in nitrification were identified using metaproteomics. For instance, the  
320 detected peptides directly involved in nitrification pathways corresponded to the nitrite  
321 oxidoreductase subunit B (NxrB), which had a 31.3% abundance increase in the nitrogen-  
322 amended samples compared to the control.

323

## 324 **DISCUSSION**

### 325 **Using multi-omic approaches for examining process rates**

326 Measuring nitrification rates in incubated soils allowed us to evaluate the explanatory  
327 and predictive power of omic approaches in a highly diverse soil system. Despite all three omic  
328 approaches revealed increased abundance for target genes, transcripts and proteins related to  
329 nitrification pathways, they differed in temporal resolution and quantitative capabilities. For  
330 instance, the strongest agreement to the observed nitrification processes (i.e., ammonia or  
331 nitrite oxidation) was for the metatranscriptomic data within the first days of incubations (e.g.,  
332 Figure 2b), whereas metagenomes lagged behind and only reflected the ongoing nitrification  
333 process after 192 hours of incubation (e.g., Supplementary Figure 6a, b). These data were  
334 presumably attributed to the fact that growth (e.g., at least a few replication cycles) should occur  
335 before metagenomics can reveal shifts in relative abundance over time. Note that microbial  
336 growth was not explicitly measured by our study to further corroborate the above conclusions  
337 and interpretations. Therefore, metagenomics could also reflect underlying microbial processes  
338 if the processes are ongoing for a period of time and are coupled with the growth of the  
339 corresponding organisms. In contrast, if the goal is to see immediate responses to a  
340 perturbation or the perturbation is short-lived (e.g., lasting a few hours), metatranscriptomic data  
341 will be preferable. We also observed that metatranscriptomes were as good as metagenomics,  
342 if not better, at reflecting microbial activity for nitrification processes even at later incubation time  
343 points. In contrast, the metaproteomes offered, at most, a qualitative glimpse at nitrification  
344 processes and were less definitive in identifying common nitrification markers. The latter was  
345 largely attributable to the computational challenges associated with proteomic data such as high  
346 peptide redundancy and the requirement of high-quality assemblies which are still challenging  
347 for highly complex soil metagenomes. Furthermore, many challenges remain for efficient

348 extraction of membrane proteins from low abundance organisms such as nitrifiers. Ultimately,  
349 these technical limitations could be reflected in a lower number of detected proteins compared  
350 to the number of metagenomic and metatranscriptomic reads recovered that encoded the  
351 proteins of interest.

352 While shifts in 16S gene ratios (cDNA/DNA) were relatively small for AOA, the 16S and  
353 functional gene ratio shifts (e.g., *amoA*) for AOB/NOB were much more pronounced throughout  
354 the incubations (Supplementary Figure 3). Nonetheless, there were changes in transcript  
355 abundances for nitrification genes from both microbial groups in the microcosms (Figure 2).  
356 These results might reflect an active and growing state for AOB/NOB and mostly active AOA  
357 communities as observed before for agricultural soil microcosms (17). The differences observed  
358 between target gene abundances and 16S gene ratios from AOA could reflect a limitation of the  
359 latter data when used as a proxy for assessing microbial activity (18). However, more frequent  
360 sampling and incubations under different physicochemical conditions will be required for more  
361 robust conclusions to emerge on the exact relationship(s) between molecular level information  
362 and process rates. The results reported here provided an overview of this relationship for soils  
363 and are highly promising for the future.

364 In terms of the ecological adaptation of the nitrifiers analyzed here, the Havana  
365 agricultural site has had a long history of cyclical seasonal inputs (e.g., fertilizers) that have  
366 shaped the structure of microbial communities in different soil layers. The AOA and AOB  
367 communities in the Havana site have legacy establishments at the 20-30 cm soil depth and are  
368 under relatively stable environmental conditions compared to the top soil layer (14). Thus,  
369 nitrogen amendments tested in our experiment and experimental conditions might not represent  
370 closely the conditions usually experienced by the examined AOA and AOB communities. The  
371 rapid response of AOB observed here might be a reflection of physiological adaptations of AOB  
372 to thrive under high nitrogen content as reported previously (17). In contrast, the low response  
373 observed for comammox and some AOA communities might reflect their limited physiological

374 capabilities to respond to high nitrogen concentrations (2, 3) that were assayed in our  
375 experimental setup.

376 Previous authors have also found metatranscriptomic approaches to be better predictors  
377 of measured microbial activity (11) in controlled laboratory systems amended with exogenous  
378 organic compounds, but have been more limited in providing insights into the whole-microbial  
379 community response to the amendment. For instance, the changes in transcripts observed at  
380 early incubation points for specific lineages (e.g., comammox vs. betaproteobacterial *amoA*)  
381 suggested ongoing microbial activity that became evident only at the DNA level (relative  
382 abundance) at the last incubation point in the metagenomes (Figure 2b). Future incubation  
383 studies could shed light on the intrinsic differences between nitrifier (and denitrifier) communities  
384 by testing variables such as oxygen availability (i.e., water saturation) and different agricultural  
385 soil types. For instance, the incubation conditions used in our study deliberately promoted  
386 nitrification over denitrification processes and as a result, the N<sub>2</sub>O production was detected due  
387 to the former process. Consequently, nitric oxide (e.g., *norB*) and nitrous oxide reductases (e.g.,  
388 *nosZ*) transcripts, which are responsible for N<sub>2</sub>O production and consumption during  
389 denitrification, respectively, were not detected in our metatranscriptomes datasets (i.e.,  
390 abundance below detection limit). Also, the use of nitrification inhibitors could help to elucidate  
391 the origin of the measured N<sub>2</sub>O whether production was biotic or abiotic, for which our data are  
392 limited in predicting. Thus, the integration of *in situ* rates along with the microbial dynamics  
393 examined by metatranscriptomes and metagenomes could provide the means to better  
394 understand and predict nitrification and N<sub>2</sub>O emission in agricultural soils.

### 395 **New insights into nitrification pathways**

396 The metagenomic and metatranscriptomic datasets combined with phylogenetic  
397 approaches provided a closer examination of the poorly studied microbial diversity in agricultural  
398 soils. Assessing the individual gene level, as opposed to whole genome transcript level,



399 provided more robust results for relating population response to measured nitrification reactions,  
400 presumably due to higher sequence coverage (less noise). Even though a direct comparison at  
401 the genome level between AOB, NOB and comammox AOB was not possible due to the lack of  
402 recovered MAGs representing AOB and NOB populations, analysis of individual 16S and  
403 nitrogen cycling genes elucidated the importance of AOB and NOB in the microcosm  
404 experiments. Our results showed that even though betaproteobacterial *amoA* transcripts  
405 responded to the addition of ammonium and urea, the relative abundance of comammox *amoA*  
406 transcripts was stable (i.e., not responding to the nitrogen amendment), although comammox  
407 populations were relatively more abundant than AOB in the microcosms. This observation is  
408 consistent with previous metagenomic results from the same agricultural soil, where comammox  
409 *amoA* genes and the organisms encoding these genes represented the highest fraction of  
410 nitrifying bacteria (14). The differences between measured genes and transcripts indicated that  
411 the incubation conditions favored the activity of *Betaproteobacteria* over comammox nitrifying  
412 bacteria, suggesting ecophysiological differences among these taxa for the incubation  
413 conditions or added substrates compared to field conditions.

414 The sequencing of isolates and environmental AOA genomes has shown that even  
415 though they encode an AmoA protein, they lack a canonical hydroxylamine oxidation pathway  
416 (19). Previous studies have proposed that nitric oxide is essential for hydroxylamine oxidation to  
417 nitrite in archaea (20). The proposed mechanism involves oxidation of ammonium to  
418 hydroxylamine followed by oxidation to nitrite catalyzed by a putative Cu-protein that uses nitric  
419 oxide as co-reactant for the oxidation of hydroxylamine. Interestingly, nitric oxide has been  
420 proposed to be derived from the activity of the NirK enzyme present in all AOA sequenced  
421 genomes. Our results show that unlike AOA *amoA* or bacterial *nirK* transcripts,  
422 *Thaumarchaeota nirK* transcripts increased in abundance in the incubated soils, supporting the  
423 abovementioned hypothesis. Therefore, even though AOA *amoA* transcripts did not show clear  
424 changes in abundances compared to their bacterial counterparts, these results might be in

425 agreement with the previous hypothesis, and likely denote an unaccounted role for  
426 *Thaumarchaeota nirK* in nitrification in agricultural soils.

#### 427 **Multi-omic limitations**

428 Soil samples are challenging to analyze not only because of their heterogeneous  
429 structure and chemical composition, but also because of the highly diverse microbial  
430 communities and slow growth kinetics. Despite the advancements presented here, there are still  
431 opportunities for further improvements. For instance, here we analyzed total RNA extractions  
432 from soils where ribosomal rRNA transcripts represented 94-98% of the total sample, limiting  
433 our study to a small fraction of transcripts related to functional genes. Current experimental  
434 approaches offer successful rRNA depletion for environmental samples, when RNA yields are  
435 not limiting (21). Additionally, all the results represented here provide only relative abundances  
436 for measured microbial markers. For instance, approaches such as qPCR or internal standards  
437 spiked into the DNA or cDNA library for sequencing (21) can strengthen and provide improved  
438 quantification compared to those presented here.

439 Metaproteomics offered an additional layer of information for the microbial activity, but it  
440 was less comprehensive compared to metagenomes and metatranscriptomes. Even though our  
441 database for proteomic analyses included a high fraction of nitrification proteins predicted from  
442 these agricultural soils, only peptides belonging to the NxrB were detected. The results obtained  
443 were attributable, at least partially, to the low biomass, especially for the low abundance  
444 nitrifiers targeted here. Further, possible protein extraction biases due to the complexity of soil  
445 matrices as well as limited extraction of membrane proteins, such AmoA, might have also  
446 influenced the outcome of our efforts (22). Nonetheless, the abundances for several peptides  
447 belonging to housekeeping proteins of nitrifier organisms were increased during the incubation  
448 time, consistent with the results from metagenomic and metatranscriptomic approaches.  
449 Therefore, metaproteomics provided a qualitative confirmation of the underlying nitrification

450 processes ongoing during our incubations and of the responsible taxa. Alternative proteomic  
451 approaches focused on a preselected set of proteins (i.e., selected reaction monitoring or target  
452 proteomics) could be used to explore low abundance nitrification proteins. For instance,  
453 targeted proteomic approaches have been used to study proteins in low abundance involved in  
454 bioremediation pathways in highly-diverse environmental systems (23). Therefore, targeted  
455 proteomics might offer new opportunities for researchers interested in detecting low-abundance  
456 peptides and prediction of process rates in complex samples (24).

457 The analyses of different omic levels obtained from the incubations showed a high  
458 correspondence between nitrification gene markers and nitrification process rates. The gene  
459 fragments and transcripts were mostly affiliated to novel nitrifier populations similar to those  
460 previously described in field soil metagenomes from the same agricultural site (14). Therefore,  
461 the gene and genome sequences reported here could facilitate future investigations of nitrogen  
462 cycling in agricultural fields; for instance, by applying qPCR assay targeting the key taxa and  
463 biomarker genes and transcripts. The combination of metagenomic and metatranscriptomic  
464 approaches used in our study provided a promising strategy for examining microbial activity in  
465 agricultural soil environments. Therefore, the findings presented here highlighted the potential of  
466 omics data to serve as reliable proxies for examining microbial processes *in situ*, especially in  
467 soils, which has been proven to be among the most challenging tasks for environmental studies.

468

## 469 **MATERIALS AND METHODS**

### 470 **Soil Sampling**

471 Our study was focused on an agricultural plot located in the Havana County, Illinois,  
472 USA (lat 40.296, long 89.944; elevation, 150 m). The site is representative of the US Midwest  
473 and has a long history of conventionally managed corn and soybean crop rotation. In October  
474 2014, we collected ~2 kg of bulk soil from a 20-30 cm soil depth as previous results have shown  
475 significant presence of ammonia-oxidizing microorganisms in this layer (14).

476

## 477 **Soil Incubations, Gas and Chemical Analyses**

478           Soil microcosms were established in triplicates, using ~120 g of soil (~8% moisture  
479 content) in 500 ml gas-tight canning jars equipped with gas sampling ports, and were sampled  
480 at six time points (0, 10, 24, 48, 120, and 192 hours). To set up the microcosms, 6 ml of 40 mM  
481  $\text{NH}_4\text{Cl}$  and 20 mM urea (80 mM N) in water used for irrigation at the site was added to two  
482 separate batches of 400 g of soil (Final concentration= 1.2  $\mu\text{moles-N/g}$  or 18.3  $\mu\text{g-N/g}$  dry  
483 weight). Two stable isotope treatments were done, one for  $\text{NH}_4\text{Cl}$  (50%  $^{15}\text{N-NH}_4\text{Cl}$  and 50%  $^{14}\text{N-}$   
484  $\text{NH}_4\text{Cl}$ ) and one for urea (50%  $^{15}\text{N-NH}_2\text{CONH}_2$  and 50%  $^{14}\text{N- NH}_2\text{CONH}_2$ ). The two treatments  
485 allowed for differentiating how the products of nitrification differed between urea and  $\text{NH}_4\text{Cl}$   
486 when both were present. After vigorously mixing, 120 g were dispensed into three separate  
487 microcosm jars and incubated in a dark growth chamber with diurnal temperature fluctuation of  
488 22-24 °C as observed in Havana field soil at 20-30 cm during the spring fertilization period (early  
489 June). Triplicate microcosms each receiving 6 ml of filtered irrigation water (no nitrogen  
490 amendment) served as controls. After each sampling point, headspace gas was collected from  
491 closed jars and the  $\text{N}_2\text{O}$  concentration was measured on a Shimadzu GC-2014 gas  
492 chromatograph (Columbia, MD) equipped with an electron capture detector. Jars were opened  
493 for soil sampling and to reestablish equilibration with atmospheric air before being resealed until  
494 the next sampling. Residual ammonium and nitrate in soil subsamples (20 g) were extracted in  
495 2 M KCL and the concentrations were determined using colorimetric analysis on a flow injection  
496 auto-analyzer (Lachat Instruments, Milwaukee, WI) (25). Soil pH (1:1 in water) and gravimetric  
497 water content were measured at each time point (Supplementary Table 1).  $^{15}\text{N}$  isotopic  
498 composition of  $\text{N}_2\text{O}$  in collected jar headspace samples was determined using an IsoPrime 100  
499 isotope ratio mass spectrometer interfaced with an IsoPrime trace gas analyzer (Cheadle  
500 Hulme, UK) at the University of Illinois at Urbana-Champaign. The  $^{15}\text{N}$  atom % enrichment of  
501 the  $\text{NO}_3^-$  pool was determined using acid trap diffusion (26) and analysis of the diffusion disks

502 on a Vario Micro Cube elemental analyzer (Elementar, Hanau, Germany) interfaced to an  
503 IsoPrime 100 continuous flow isotope ratio mass spectrometer (Cheadle Hulme, UK).  $^{15}\text{NO}_3^-$   
504 and  $^{15}\text{N}_2\text{O}$  production rates were calculated from the change in  $^{15}\text{NO}_3^-$  and  $^{15}\text{N}_2\text{O}$   
505 concentrations, respectively, from one time point to the following sampling time point.  $\text{NO}_3^-$  and  
506  $\text{N}_2\text{O}$  production rates were estimated from the  $^{15}\text{NO}_3^-$  and  $^{15}\text{N}_2\text{O}$  production rates based on the  
507 mean  $^{15}\text{N}$  excess atom % of the  $\text{NH}_4^+$  source pool (27). No inhibitors of nitrogen cycle pathways  
508 were used in the incubations.

509

### 510 **Nucleic Acid Extractions**

511 DNA was extracted from ~0.5 g of soil using a modified phenol-chloroform and  
512 purification protocol as previously described (28). For RNA extraction, 2 gr of soil was preserved  
513 in LifeGuard (MoBio) and stored at  $-80^\circ\text{C}$ . A modified protocol derived from the PowerMax Soil  
514 DNA kit for extracting RNA was used for total RNA extractions (MoBio). TURBO DNase  
515 (Ambion) was used to remove DNA according to the recommendations of the manufacturer.  
516 Nucleic acid extracts were quantified using Quant-it ds DNA HS and HS RNA assays  
517 (Invitrogen) according to the instructions of the manufacturer. RNA quality was assessed using  
518 Agilent RNA 6000 pico kit (Agilent Technologies) and samples having RNA integrity number  
519 (RIN) above 7 were used.

520

### 521 **Nucleic Acid Sequencing**

522 For metagenomes, dual-indexed DNA sequencing libraries were prepared using the  
523 Illumina Nextera XT DNA library prep kit according to manufacturer's instructions, except that  
524 the protocol was terminated after isolation of cleaned amplified double stranded libraries. For  
525 metatranscriptomes, single-indexed cDNA sequencing libraries were prepared using ScriptSeq  
526 v2 protocol using ~25 ng of total RNA as input. All DNA and cDNA library concentrations were

527 determined by fluorescent quantification using a Qubit HS DNA kit and Qubit 2.0 fluorometer  
528 (ThermoFisher Scientific) according to manufacturer's instructions and samples were run on a  
529 High Sensitivity DNA chip using the Bioanalyzer 2100 instrument (Agilent) to determine quality  
530 and average library insert sizes. An equimolar mixture of the libraries was sequenced on an  
531 Illumina HiSEQ 2500 instrument (School of Biological Sciences, Georgia Institute of  
532 Technology) for a rapid run of 300 cycles (2 x 150 bp paired end) using the HiSeq Rapid PE  
533 Cluster Kit v2 and HiSeq Rapid SBS Kit v2 (Illumina). Adapter trimming and demultiplexing of  
534 sequenced samples was carried out by the Illumina software, according to the  
535 recommendations of the manufacturer.

536

### 537 **Short-read Analyses**

538 Metagenomic and metatranscriptomic raw reads (FASTQ) for all samples were trimmed  
539 using SolexaQA (29) using a Phred score cutoff of 20 and minimum fragment length of 50 bp.  
540 Short-reads derived from metatranscriptomes were merged using PEAR using default  
541 parameters (30). Average coverage for each sequenced metagenome was determined by  
542 Nonpareil (15) using default settings except that 2,000 reads were used as query (-X option)  
543 (Supplementary Tables 3 and 4).

544 Short-read sequences encoding 16S rRNA gene fragments were extracted from each  
545 metagenome and metatranscriptome by SortMeRNA (31) and their taxonomy was assigned  
546 using RDP classifier (cutoff 50) (32).

547 To identify and quantify reads encoding specific protein sequences of interest, we used  
548 the previously published protein sequences as references (14) for the archaeal ammonia  
549 monooxygenase alpha subunit (AmoA), bacterial AmoA, hydroxylamine oxidase (HaoA), nitrite  
550 oxidoreductase alpha subunit (NxrA), nitrite reductase (NirK), nitric oxide reductase beta subunit  
551 (NorB), nitrous oxide (NosZ), nitrite reductase (NrfA) and DNA-directed RNA polymerase  
552 subunit beta (RpoB). Independent ROCKER (33) models (length=125 bp) were subsequently built

553 based on these reference protein sequences with the exception of NarG and NxrA, where the  
554 sequences were combined into a single model. Trimmed short-reads from soil metagenomes  
555 were used as query for BLASTx searches (e-value 0.01) against the latter protein databases  
556 and outputs were filtered using the previously generated ROCKER models. For metagenomes,  
557 target gene abundance in metagenomes was determined as genome equivalents by calculating  
558 the ratio between normalized target reads (number of reads matching divided by median protein  
559 length) and normalized RpoB reads (number of reads matching divided by median RpoB protein  
560 length), a universal single-copy gene. For metatranscriptomes, target transcripts abundance  
561 was calculated as reads per kilobase of transcript per million mapped reads (RPKM). Protein  
562 databases and ROCKER models are available through <http://enve-omics.ce.gatech.edu/>.

563

#### 564 **Assembly and Binning of Metagenomic Populations**

565 Short-read metagenomes from control and treatments (t=0,120 and 192 hours) were co-  
566 assembled using IDBA\_UD v1.1.1 (34) and binning was performed as previously described  
567 (14). Taxonomic classification and degree of novelty (novel species, genus, etc) of the MAGs  
568 were obtained from the Microbial Genomes Atlas (MiGA) webserver (35). MAG abundance was  
569 determined as the total length of all matching metagenomic or metatranscriptomic reads to the  
570 binned contigs from BLASTn searches (identity  $\geq 98\%$  and fraction of read aligned  $\geq 50\%$ )  
571 divided by the metagenomic or metatranscriptomic sample sizes (in millions of reads) and the  
572 length of the bin genomes in Kbp (Kilo base pairs). Reads encoding rRNA sequences (such as  
573 5S, 5.8S, 16S, and 23S) were identified by SortMeRNA, and removed for non-rRNA analyses in  
574 order to avoid overestimating abundances.

575 Phylogenetic reconstruction of MAGs was performed based on the concatenated  
576 alignment of universal single-copy proteins identified for each bin using the “HMM.essential.rb”  
577 script of the enveomics collection (36). For this, thirty bacterial proteins present in the  
578 corresponding bins MAGs were extracted and multiple alignments for each protein were

579 generated using ClustalΩ. Concatenated alignments without invariable sites were generated for  
580 archaeal and bacterial alignments using the script “Aln.cat.rb”. Phylogenetic reconstructions  
581 were determined using in RAXML v8.0.19 (-f a, -m PROTGAMMAAUTO, -N 100) and visualized  
582 in iTol.

583 N cycle protein sequences in the co-assembly and MAGs were detected using hidden  
584 Markov models obtained from FUNGENE (37), using HMMer (38). Detected target N cycle  
585 proteins were manually curated, when necessary, by assessing the presence of characteristic  
586 amino acid and phylogenetic congruency.

587

### 588 **Phylogenetic Trees and Placement of Short-reads**

589 To assess the phylogenetic affiliation of metagenomic or metatranscriptomic reads, reference  
590 and fully assembled protein sequences were aligned using ClustalΩ (39) with default  
591 parameters. Resulting alignments were used to build phylogenetic trees in RAXML v8.0.19 (40).  
592 Short-reads encoding the protein of interest were extracted from metagenomes or  
593 metatranscriptomes using ROCKER (BLASTx) and placed in their corresponding phylogenetic  
594 tree using the methodology previously described (14). Quantification of the number of reads  
595 assigned to a specific clade (e.g., to distinguish between *nxrA* or *narG* reads) was done using  
596 the “JPlace.distances.rb” script, also available in the enveomics collection. To quantify *nirK*  
597 gene fragments assigned to specific clades, the same process as described above was  
598 repeated except that all reads detected by multiple ROCKER models to previously described  
599 clades (41) (clades I+II, III and *Thaumarchaeota*) were used.

600

### 601 **Shotgun Metaproteomics**

602 Approximately 10 g of soil were collected from the 192 hours control and <sup>15</sup>N-  
603 NH<sub>4</sub><sup>+</sup> amended microcosms and stored at -80°C. Frozen soil (5 g) was thawed and suspended  
604 in lysis buffer and boiled for 15 minutes as described previously (42). The supernatant was



605 retained and amended with 100% chilled TCA to final concentration of 25% (vol/vol) and kept at  
606 -20°C overnight. Samples were centrifuged at 21,000 x *g* for 20 min and the protein pellets  
607 processed as described previously (43) and solubilized in 6 M guanidine buffer (6 M guanidine;  
608 10 mM dithiothreitol [DTT] in Tris-CaCl<sub>2</sub> buffer (10 mM Tris; , pH 7.8) with 3 hr incubation at  
609 60°C. An aliquot of 25 µl/ sample was retained for protein estimation and the rest of the protein  
610 sample was digested, peptides desalted and solvent exchanged as described earlier (44). The  
611 amount of protein extracted from each sample was calculated using the RC/DC protein  
612 estimation kit (Bio-Rad Laboratories, Hercules, CA, USA) as per the manufacturer's instructions.  
613 Bovine serum albumin (supplied with the kit) was used as standard for the assay.

614 All chemicals were obtained from Sigma Chemical Co. (St. Louis, MO), unless specified  
615 otherwise. High performance liquid chromatography- (HPLC-) grade water and other solvents  
616 were obtained from Burdick & Jackson (Muskegon, MI), 99% formic acid was purchased from  
617 EM Science (Darmstadt, Germany) and sequencing-grade trypsin was acquired from Promega  
618 (Madison, WI).

619

#### 620 **NanoLC-MS/MS Analysis.**

621 Peptides (75 µg) were loaded onto in-house prepared biphasic resin packed column  
622 [SCX (Luna, Phenomenex, Torrance, CA) and C18 (Aqua, Phenomenex, Torrance, CA)] as  
623 described earlier (44, 45) and subjected to an offline wash for 15 min as previously described  
624 (46). The sample column was aligned with an in-house C18 packed nanospray tip (New  
625 Objective, Woburn, MA) connected to a Proxeon (Odense, Denmark) nanospray source as  
626 previously detailed (46). Peptides were eluted and subjected to chromatographic separation and  
627 measurements via 24-hr Multi-Dimensional Protein Identification Technology (MuDPIT)  
628 approach as described earlier (44-46). Measurements were carried out using LTQ mass  
629 spectrometer (Thermo Fisher Scientific, Germany) coupled to the Ultimate 3000 HPLC system

630 (Dionex, USA) and operated in data dependent mode, via Thermo Xcalibur software V2.1.0 as  
631 described earlier (45).

632 For protein identification, the raw spectra from each run were searched against a custom  
633 database and was constructed using protein sequences predicted from metagenome  
634 assemblies obtained from the same soil and 20-30 cm depth (14), metagenome assemblies  
635 from incubations (Supplementary Table 2), and reference proteomes for 47 common soil  
636 organisms (Supplementary Table 5). These predicted proteins were used for constructing a  
637 database for metaproteomic searches (available through [http://](http://enve-omics.ce.gatech.edu/data/multiomics-soil) [http://enve-](http://enve-omics.ce.gatech.edu/data/multiomics-soil)  
638 [omics.ce.gatech.edu/data/multiomics-soil](http://enve-omics.ce.gatech.edu/data/multiomics-soil)). Database matching was done via Myrimatch v2.1  
639 algorithm (47) set to parameters described before (48) with minor modifications where static  
640 cysteine and dynamic oxidation modifications were not considered. Identification of at least two  
641 peptides per protein (one unique and one non-unique) sequence was a prerequisite for protein  
642 identifications. Common contaminant peptide sequences from trypsin and keratin were  
643 concatenated to the database. Reverse database sequences were also included in the  
644 database as decoy sequences to calculate false discovery rate (FDR). For data analysis,  
645 spectral counts of identified peptides was normalized as described before (49) to obtain the  
646 normalized spectral abundance factor (NSAF) and the NSAF values were multiplied by a  
647 constant number (100,000) for better visualization and referred to as normalized spectral counts  
648 (nSpc). The nSpc were used to compare expression of proteins across different samples and  
649 different time points. Detected proteins predicted from metagenomic assemblies were annotated  
650 using BLASTp (50) and UniProt database as reference (51) (downloaded in May of 2017).

651

## 652 **Accession numbers**

653 Raw metagenomic and metatranscriptomic soil datasets and MAGs are deposited in the  
654 European Nucleotide archive under study number PRJEB27434.

655

656

657 **ACKNOWLEDGMENTS**

658 We thank Joel Kostka and Alissa Hooker for helpful discussions related to the manuscript. This

659 work was supported in part by U.S. Department of Energy, Office of Biological and

660 Environmental Research, Genomic Science Program [award DE-SC0006662], US National

661 Science Foundation [Award 1831582], and the Chilean Fulbright-Conicyt doctoral scholarship

662 [L.H.O.].

663

664 **Figure Legends**

665

666 **Figure 1. Nitrogen pools and fluxes in soil incubations amended with NH<sub>4</sub><sup>+</sup> and urea.**

667 Mean NH<sub>4</sub><sup>+</sup> and NO<sub>3</sub><sup>-</sup> concentrations (A), total NO<sub>3</sub><sup>-</sup> production rate (B), and total N<sub>2</sub>O production  
668 rate (C) for the nitrogen-amended and control (irrigation water only) microcosms at each  
669 incubation time point. Error bars represent the standard deviation from replicate samples (n=6  
670 for nitrogen-amended and n=3 for control).

671

672 **Figure 2. Nitrification genes in incubated soils.** A. Relative expression ratios for each  
673 nitrification step in incubated soils were determined at 10, 48, 120, and 192 hours incubation. B  
674 and C show determined RPKM values for bacterial *amoA* (B), *hao* (C), thaumarchaeotal *amoA*  
675 (D), and *nirK* (E) transcripts from metatranscriptomes.

676

677 **Figure 3. Metaproteomic analyses of incubated soils at 192 hours of incubation.** Panel A  
678 shows taxonomic affiliation (class) and abundance (average spectral counts) for peptides  
679 detected in control and N-amended incubations. Panel B shows summarized functional  
680 annotation of detected peptides using SEED functional categories.

681

682 **REFERENCES**

683

- 684 1. **Ravishankara AR, Daniel JS, Portmann RW.** 2009. Nitrous oxide (N<sub>2</sub>O): the dominant  
685 ozone-depleting substance emitted in the 21<sup>st</sup> century. *Science* **326**:123–125.
- 686 2. **Daims H, Lebedeva EV, Pjevac P, Han P, Herbold C, Albertsen M, Jehmlich N,**  
687 **Palatinszky M, Vierheilig J, Bulaev A, Kirkegaard RH, Bergen von M, Rattei T,**  
688 **Bendinger B, Nielsen PH, Wagner M.** 2015. Complete nitrification by *Nitrospira*  
689 bacteria. *Nature* **528**:504–509.
- 690 3. **van Kessel MAHJ, Speth DR, Albertsen M, Nielsen PH, Op den Camp HJM, Kartal B,**  
691 **Jetten MSM, Lüscher S.** 2015. Complete nitrification by a single microorganism. *Nature*  
692 **528**:555–559.

- 693 4. **Kool DM, Dolfig J, Wrage N, Van Groenigen JW.** 2011. Nitrifier denitrification as a  
694 distinct and significant source of nitrous oxide from soil. *Soil Biol Biochem* **43**:174–178.
- 695 5. **Zhu X, Burger M, Doane TA, Horwath WR.** 2013. Ammonia oxidation pathways and  
696 nitrifier denitrification are significant sources of N<sub>2</sub>O and NO under low oxygen  
697 availability. *Proc Natl Acad Sci USA* **110**:6328–6333.
- 698 6. **Prosser JI, Nicol GW.** 2012. Archaeal and bacterial ammonia-oxidisers in soil: the quest  
699 for niche specialisation and differentiation. *Trends Microbiol* **20**:523–531.
- 700 7. **Gubry-Rangin C, Nicol GW, Prosser JI.** 2010. Archaea rather than bacteria control  
701 nitrification in two agricultural acidic soils. *FEMS Microbiol Ecol* **74**:566–574.
- 702 8. **Hettich RL, Sharma R, Chourey K, Giannone RJ.** 2012. Microbial metaproteomics:  
703 identifying the repertoire of proteins that microorganisms use to compete and cooperate  
704 in complex environmental communities. *Curr Opin Microbiol* **15**:373–380.
- 705 9. **Hug LA, Thomas BC, Sharon I, Brown CT, Sharma R, Hettich RL, Wilkins MJ,**  
706 **Williams KH, Singh A, Banfield JF.** 2015. Critical biogeochemical functions in the  
707 subsurface are associated with bacteria from new phyla and little studied lineages.  
708 *Environ Microbiol* **18**:159–173.
- 709 10. **Jones SE, Lennon JT.** 2010. Dormancy contributes to the maintenance of microbial  
710 diversity. *Proc Natl Acad Sci USA* **107**:5881–5886.
- 711 11. **Helbling DE, Ackermann M, Fenner K, Kohler H-PE, Johnson DR.** 2012. The activity  
712 level of a microbial community function can be predicted from its metatranscriptome.  
713 *ISME J* **6**:902–904.
- 714 12. **Schneider T, Keiblinger KM, Schmid E, Sterflinger-Gleixner K, Ellersdorfer G,**  
715 **Roschitzki B, Richter A, Eberl L, Zechmeister-Boltenstern S, Riedel K.** 2012. Who is  
716 who in litter decomposition? Metaproteomics reveals major microbial players and their  
717 biogeochemical functions. *ISME J* **6**:1749–1762.
- 718 13. **Hultman J, Waldrop MP, Mackelprang R, David MM, McFarland J, Blazewicz SJ,**  
719 **Harden J, Turetsky MR, McGuire AD, Shah MB, VerBerkmoes NC, Lee LH,**  
720 **Mavrommatis K, Jansson JK.** 2015. Multi-omics of permafrost, active layer and  
721 thermokarst bog soil microbiomes. *Nature* **521**:208–212.
- 722 14. **Orellana LH, Chee-Sanford JC, Sanford RA, Löffler FE, Konstantinidis KT.** 2018.  
723 Year-Round Shotgun Metagenomes Reveal Stable Microbial Communities in Agricultural  
724 Soils and Novel Ammonia Oxidizers Responding to Fertilization. *Appl Environ Microbiol*  
725 **84**:e01646–17.
- 726 15. **Rodriguez-R LM, Konstantinidis KT.** 2014. Nonpareil: a redundancy-based approach to  
727 assess the level of coverage in metagenomic datasets. *Bioinformatics* **30**:629–635.
- 728 16. **Luo C, Rodriguez-R LM, Konstantinidis KT.** 2014. MyTaxa: an advanced taxonomic  
729 classifier for genomic and metagenomic sequences. *Nucleic Acids Res* **42**:e73–e73.

- 730 17. **Jia Z, Conrad R.** 2009. Bacteria rather than Archaea dominate microbial ammonia  
731 oxidation in an agricultural soil. *Environ Microbiol* **11**:1658–1671.
- 732 18. **Blazewicz SJ, Barnard RL, Daly RA, Firestone MK.** 2013. Evaluating rRNA as an  
733 indicator of microbial activity in environmental communities: limitations and uses. *ISME J*  
734 **7**:2061–2068.
- 735 19. **Stahl DA, la Torre de JR.** 2012. Physiology and diversity of ammonia-oxidizing archaea.  
736 *Annu Rev Microbiol* **66**:83–101.
- 737 20. **Kozlowski JA, Stieglmeier M, Schleper C, Klotz MG, Stein LY.** 2016. Pathways and  
738 key intermediates required for obligate aerobic ammonia-dependent chemolithotrophy in  
739 bacteria and Thaumarchaeota. *ISME J* **10**:1836–1845.
- 740 21. **Tsementzi D, Poretsky R, Rodriguez-R LM, Luo C, Konstantinidis KT.** 2014.  
741 Evaluation of metatranscriptomic protocols and application to the study of freshwater  
742 microbial communities. *Environ Microbiol Rep* **6**:640–655.
- 743 22. **VerBerkmoes NC, Denev VJ, Hettich RL, Banfield JF.** 2009. Systems Biology:  
744 Functional analysis of natural microbial consortia using community proteomics. *Nat Rev*  
745 *Microbiol* **7**:196–205.
- 746 23. **Werner JJ, Ptak AC, Rahm BG, Zhang S, Richardson RE.** 2009. Absolute  
747 quantification of *Dehalococcoides* proteins: enzyme bioindicators of chlorinated ethene  
748 dehalorespiration. *Environ Microbiol* **11**:2687–2697.
- 749 24. **Hood LE, Omenn GS, Moritz RL, Aebersold R, Yamamoto KR, Amos M, Hunter**  
750 **Cevera J, Locascio L.** 2012. New and improved proteomics technologies for  
751 understanding complex biological systems: Addressing a grand challenge in the life  
752 sciences. *Proteomics* **12**:2773–2783.
- 753 25. **Yang WH, Traut BH, Silver WL.** 2015. Microbially mediated nitrogen retention and loss  
754 in a salt marsh soil. *Ecosphere* **6**:art7.
- 755 26. **Herman DJ, Brooks PD, Ashraf M, Azam F, Mulvaney RL.** 1995. Evaluation of  
756 methods for nitrogen-15 analysis of inorganic nitrogen in soil extracts. II. Diffusion  
757 methods. *Commun Soil Sci Plant Anal* **26**:1675–1685.
- 758 27. **Templer PH, Silver WL, Pett-Ridge J, DeAngelis KM, Firestone MK.** 2008. Plant and  
759 microbial controls on nitrogen retention and loss in a humid tropical forest. *Ecology*  
760 **89**:3030–3040.
- 761 28. **Orellana LH, Rodriguez-R LM, Higgins S, Chee-Sanford JC, Sanford RA, Ritalahti**  
762 **KM, Löffler FE, Konstantinidis KT.** 2014. Detecting nitrous oxide reductase (NosZ)  
763 genes in soil metagenomes: method development and implications for the nitrogen cycle.  
764 *mBio* **5**:e01193–14.
- 765 29. **Cox MP, Peterson DA, Biggs PJ.** 2010. SolexaQA: At-a-glance quality assessment of  
766 Illumina second-generation sequencing data. *BMC Bioinformatics* **11**:485.

- 767 30. **Zhang J, Kobert K, Flouri T, Stamatakis A.** 2014. PEAR: a fast and accurate Illumina  
768 Paired-End reAd mergeR. *Bioinformatics* **30**:614–620.
- 769 31. **Kopylova E, Noé L, Touzet H.** 2012. SortMeRNA: fast and accurate filtering of  
770 ribosomal RNAs in metatranscriptomic data. *Bioinformatics* **28**:3211–3217.
- 771 32. **Wang Q, Garrity GM, Tiedje JM, Cole JR.** 2007. Naive Bayesian classifier for rapid  
772 assignment of rRNA sequences into the new bacterial taxonomy. *Appl Environ Microbiol*  
773 **73**:5261–5267.
- 774 33. **Orellana LH, Rodriguez-R LM, Konstantinidis KT.** 2017. ROcker: accurate detection  
775 and quantification of target genes in short-read metagenomic data sets by modeling  
776 sliding-window bitscores. *Nucleic Acids Res* **45**:e14.
- 777 34. **Peng Y, Leung HCM, Yiu SM, Chin FYL.** 2012. IDBA-UD: a de novo assembler for  
778 single-cell and metagenomic sequencing data with highly uneven depth. *Bioinformatics*  
779 **28**:1420–1428.
- 780 35. **Rodriguez-R LM, Gunturu S, Harvey WT, Rosselló-Móra R, Tiedje JM, Cole JR,**  
781 **Konstantinidis KT.** 2018. The Microbial Genomes Atlas (MiGA) webserver: taxonomic  
782 and gene diversity analysis of Archaea and Bacteria at the whole genome level. *Nucleic*  
783 *Acids Res* **84**:e00014.
- 784 36. **Rodriguez-R LM, Konstantinidis KT.** 2016. The enveomics collection: a toolbox for  
785 specialized analyses of microbial genomes and metagenomes. *PeerJ Preprints*  
786 **4**:e1900v1.
- 787 37. **Fish JA, Chai B, Wang Q, Sun Y, Brown CT, Tiedje JM, Cole JR.** 2013. FunGene: the  
788 functional gene pipeline and repository. *Frontiers in Microbiology* **4**:291.
- 789 38. **Eddy SR.** 2011. Accelerated Profile HMM Searches. *PLoS Comput Biol* **7**:e1002195.
- 790 39. **Sievers F, Wilm A, Dineen D, Gibson TJ, Karplus K, Li W, Lopez R, McWilliam H,**  
791 **Remmert M, Söding J, Thompson JD, Higgins DG.** 2011. Fast, scalable generation of  
792 high-quality protein multiple sequence alignments using Clustal Omega. *Mol Syst Biol*  
793 **7**:539–539.
- 794 40. **Stamatakis A.** 2006. RAxML-VI-HPC: maximum likelihood-based phylogenetic analyses  
795 with thousands of taxa and mixed models. *Bioinformatics* **22**:2688–2690.
- 796 41. **Wei W, Isobe K, Nishizawa T, Zhu L, Shiratori Y, Ohte N, Koba K, Otsuka S, Senoo**  
797 **K.** 2015. Higher diversity and abundance of denitrifying microorganisms in environments  
798 than considered previously. *ISME J* **9**:1–12.
- 799 42. **Chourey K, Jansson J, VerBerkmoes N, Shah M, Chavarria KL, Tom LM, Brodie EL,**  
800 **Hettich RL.** 2010. Direct cellular lysis/protein extraction protocol for soil metaproteomics.  
801 *J Proteome Res* **9**:6615–6622.
- 802 43. **Chourey K, Nissen S, Vishnivetskaya T, Shah M, Pfiffner S, Hettich RL, Löffler FE.**  
803 2013. Environmental proteomics reveals early microbial community responses to  
804 biostimulation at a uranium- and nitrate-contaminated site. *Proteomics* **13**:2921–2930.

- 805 44. **Thompson MR, VerBerkmoes NC, Chourey K, Shah M, Thompson DK, Hettich RL.**  
806 2007. Dosage-dependent proteome response of *Shewanella oneidensis* MR-1 to acute  
807 chromate challenge. *J Proteome Res* **6**:1745–1757.
- 808 45. **Brown SD, Thompson MR, VerBerkmoes NC, Chourey K, Shah M, Zhou J, Hettich**  
809 **RL, Thompson DK.** 2006. Molecular dynamics of the *Shewanella oneidensis* response  
810 to chromate stress. *Mol Cell Proteomics* **5**:1054–1071.
- 811 46. **Sharma R, Dill BD, Chourey K, Shah M, VerBerkmoes NC, Hettich RL.** 2012.  
812 Coupling a detergent lysis/cleanup methodology with intact protein fractionation for  
813 enhanced proteome characterization. *J Proteome Res* **11**:6008–6018.
- 814 47. **Tabb DL, Fernando CG, Chambers MC.** 2007. MyriMatch: highly accurate tandem  
815 mass spectral peptide identification by multivariate hypergeometric analysis. *J Proteome*  
816 *Res* **6**:654–661.
- 817 48. **Xiong W, Giannone RJ, Morowitz MJ, Banfield JF, Hettich RL.** 2015. Development of  
818 an enhanced metaproteomic approach for deepening the microbiome characterization of  
819 the human infant gut. *J Proteome Res* **14**:133–141.
- 820 49. **Paoletti AC, Parmely TJ, Tomomori-Sato C, Sato S, Zhu D, Conaway RC, Conaway**  
821 **JW, Florens L, Washburn MP.** 2006. Quantitative proteomic analysis of distinct  
822 mammalian Mediator complexes using normalized spectral abundance factors. *Proc Natl*  
823 *Acad Sci USA* **103**:18928–18933.
- 824 50. **Camacho C, Coulouris G, Avagyan V, Ma N, Papadopoulos J, Bealer K, Madden TL.**  
825 2009. BLAST+: architecture and applications. *BMC Bioinformatics* **10**:421
- 826 51. **UniProt Consortium.** 2015. UniProt: a hub for protein information. *Nucleic Acids Res*  
827 **43**:D204–12.
- 828



**Figure 1**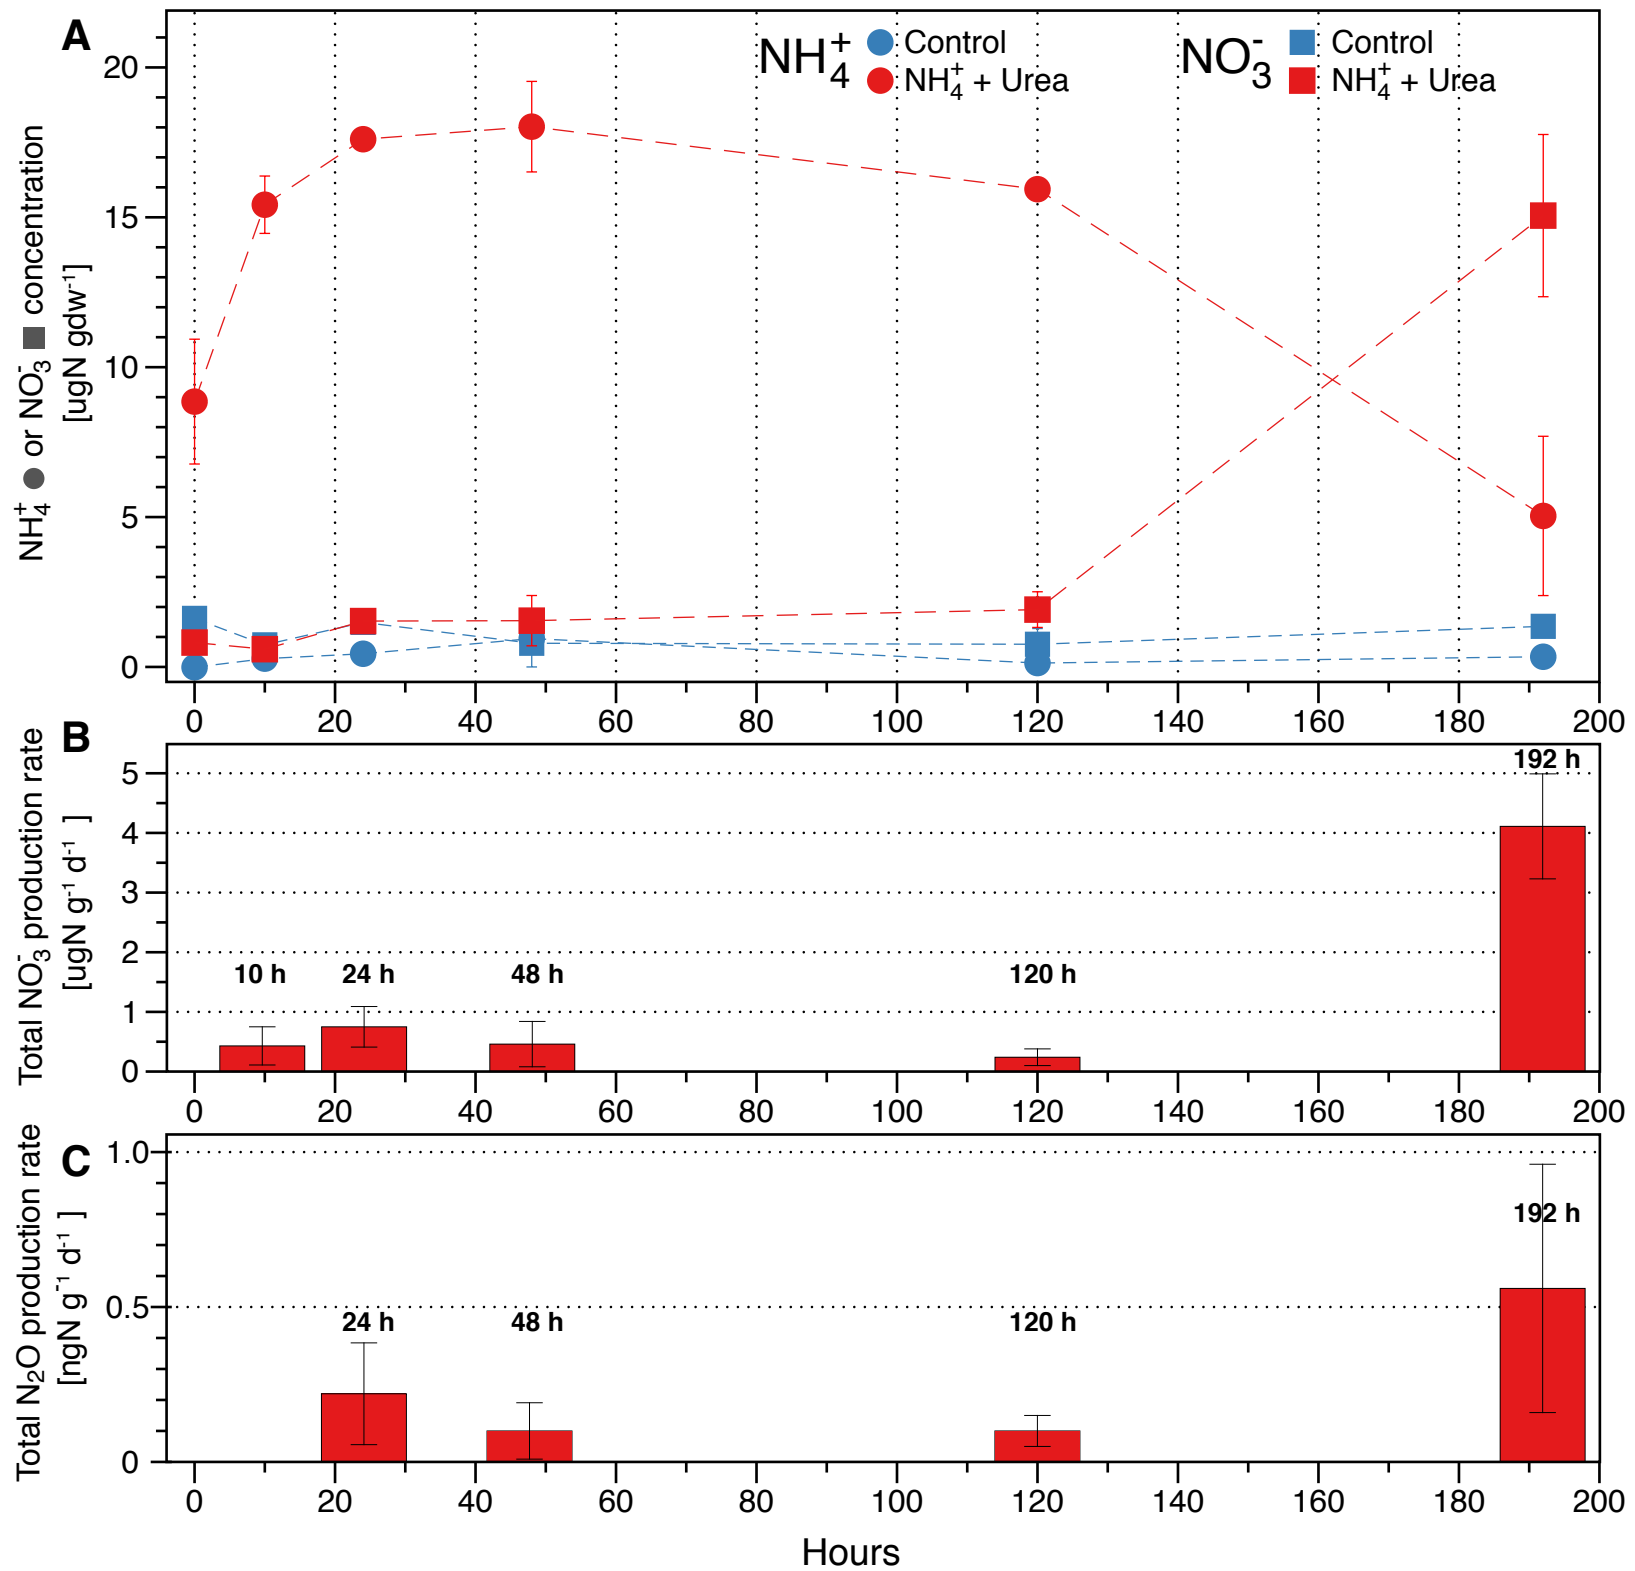

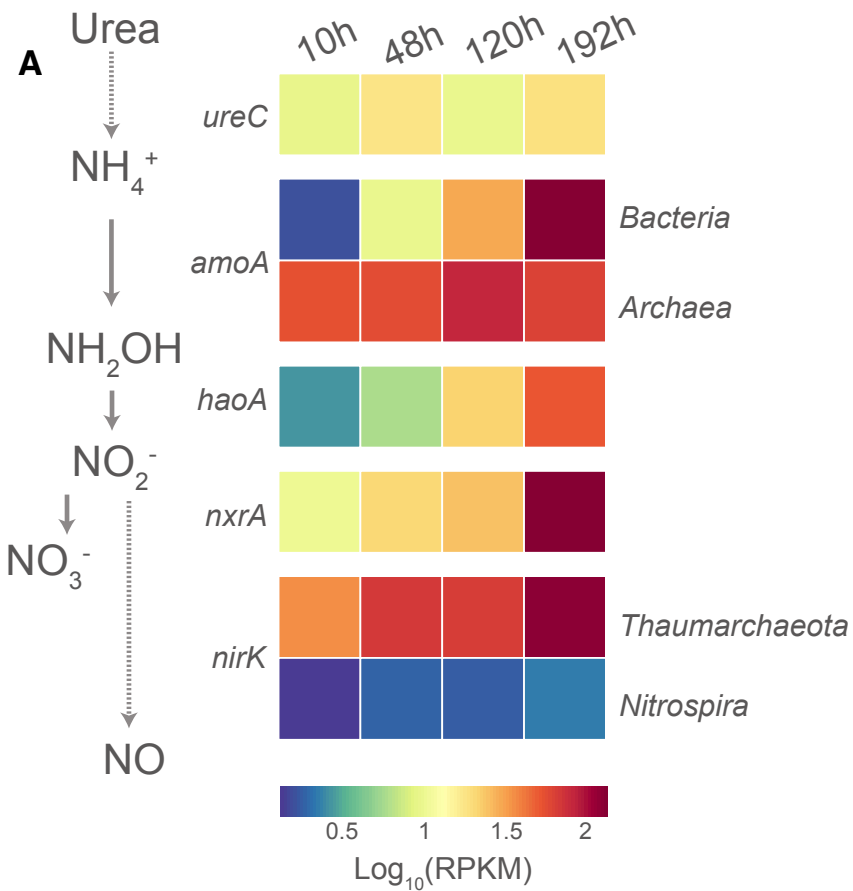

**Figure 2**

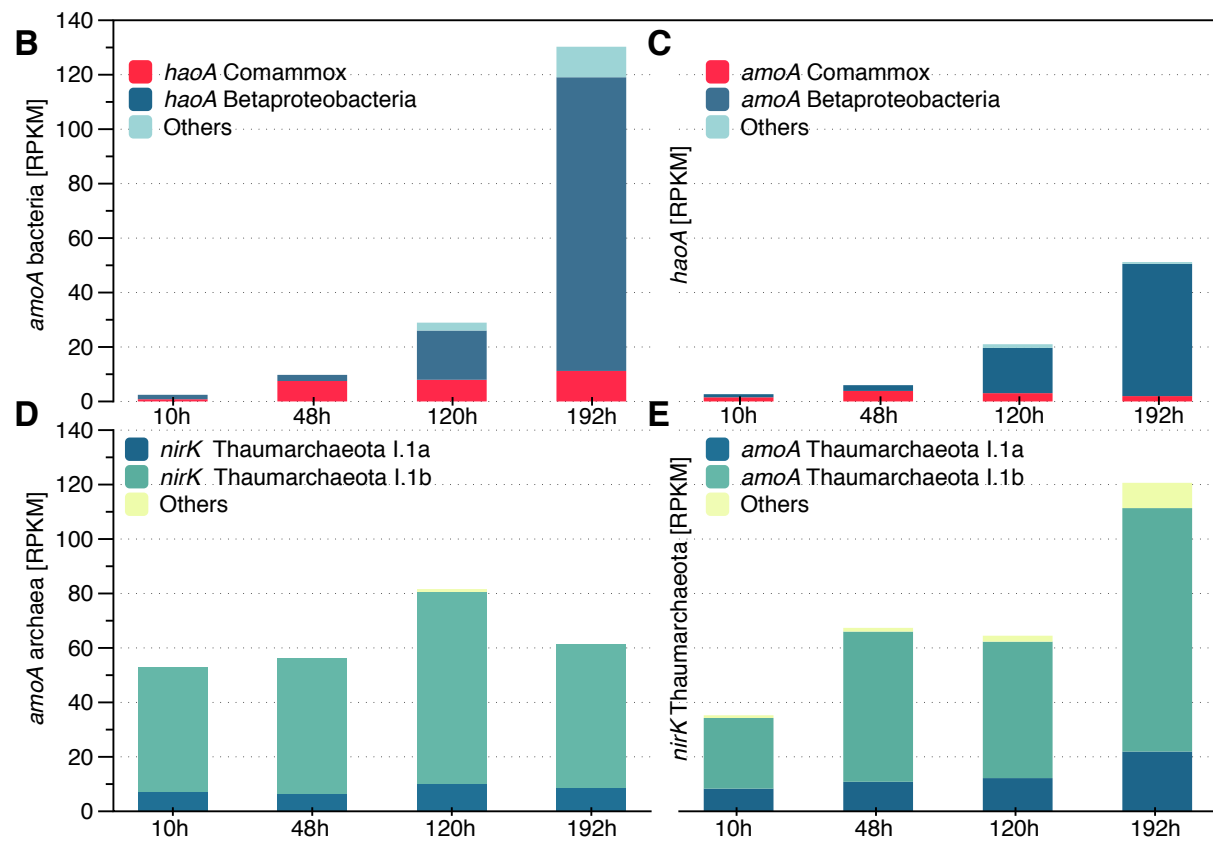

**Figure 3**

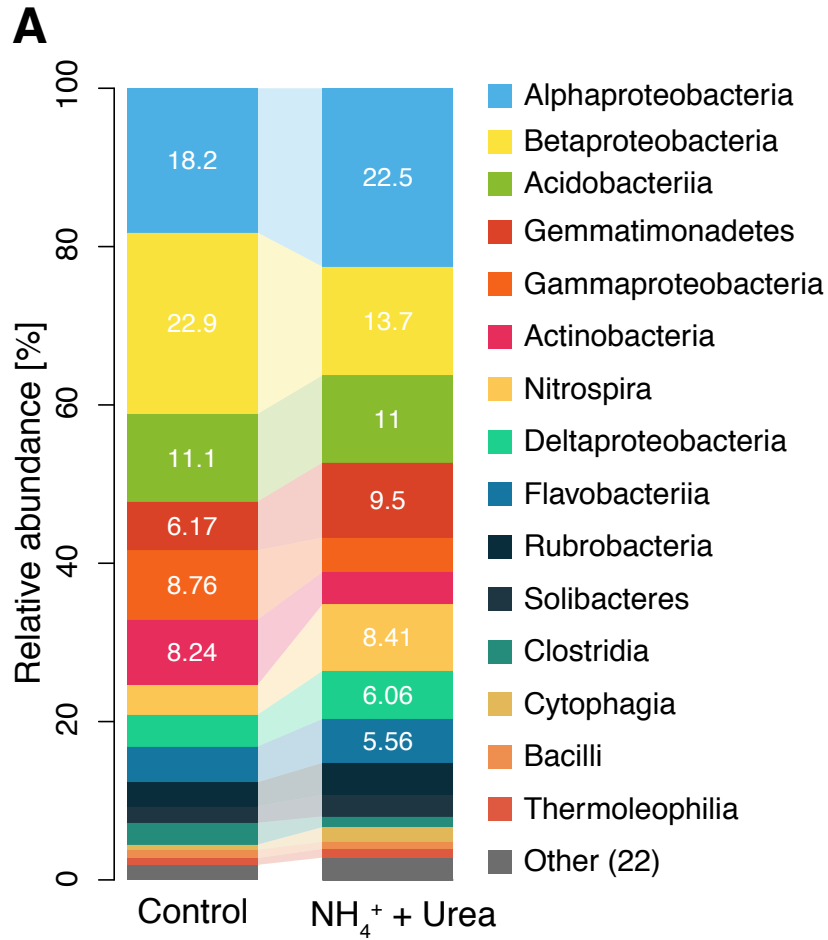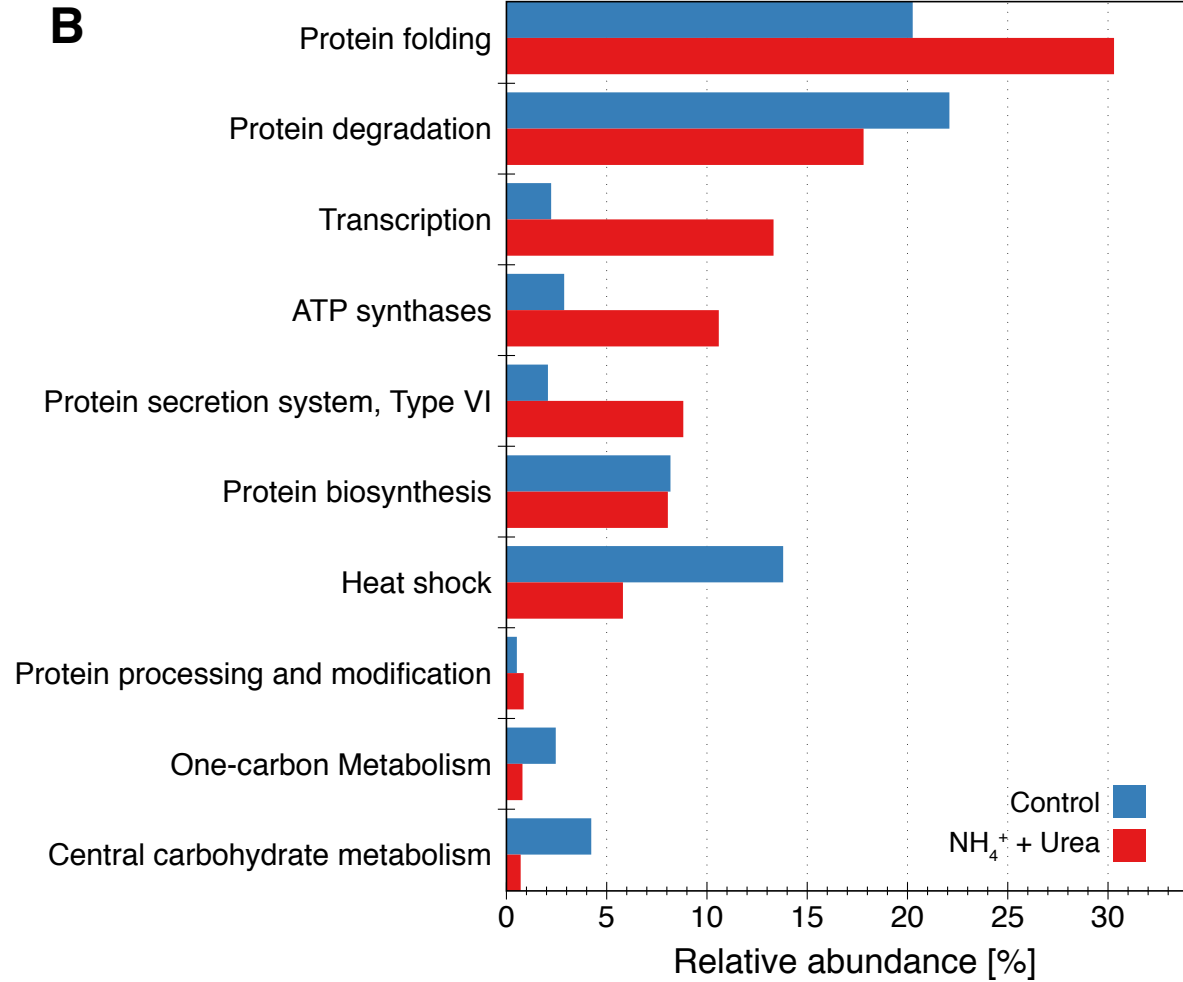

Source: https://www.biorxiv.org/content/10.1101/466680v1.full.pdf
